# Supplementary material for: Anti-HSV Activity of Metallic Nanoparticles Functionalized with Sulfonates vs. Polyphenols
Source: MDPI journal article supplement (doi:10.3390/ijms232113104), 2022-10-28
Supplement: s1 [file s1]

## *Supplementary material*

### Antiviral Activity of Metallic Nanoparticles Functionalized with Sulfonates vs. Polyphenols

Emilia Tomaszewska<sup>1</sup>, Katarzyna Ranoszek-Soliwoda<sup>1</sup>, Katarzyna Bednarczyk<sup>1</sup>,  
Agnieszka Lech<sup>1</sup>, Martyna Janicka<sup>2,3</sup>, Marcin Chodkowski<sup>2</sup>, Maciej Psarski<sup>1</sup>, Grzegorz  
Celichowski<sup>1</sup>, Malgorzata Krzyzowska<sup>2</sup>, Jarosław Grobelny<sup>1\*</sup>

<sup>1</sup>Department of Materials Technology and Chemistry, Faculty of Chemistry, University of  
Lodz, Pomorska 163 St., 90-236 Lodz, Poland

<sup>2</sup>Laboratory of Nanobiology and Biomaterials, Military Institute of Hygiene and  
Epidemiology, Kozielska 4 St., 01-063 Warsaw, Poland

<sup>3</sup>Division of Microbiology, Department of Preclinical Sciences, Institute of Veterinary  
Medicine, Warsaw University of Life Sciences, 02-786 Warsaw

Corresponding author: [jaroslaw.grobelny@chemia.uni.lodz.pl](mailto:jaroslaw.grobelny@chemia.uni.lodz.pl)

**Table S1.** Toxicity of 10 ppm/ml silver or gold nanoparticles modified with tannic acid (TA); 2-mercaptoethanesulfonate (MES) or 11-mercaptopundecane-1-sulfonate (MUS) measured by the MTT assay (- (4, 5-Dimethyl-2-thiazolyl)-2, 5-diphenyl-2H-tetrazolium bromide in Vero cell line after 24 exposure. The cellular viability was calculated as the percentage of viable cells relative to the negative control. All experiments were performed in triplicate. \* represents significant differences with  $p \leq 0.05$ , \*\*  $p \leq 0.001$  in comparison to negative control – untreated cells (Student t test). On the basis of results from MTT assay, MNTC (maximum non-toxic concentrations) was calculated as NPs concentration with  $\leq 20\%$  of non-viable cells and these concentrations were used for in vitro antiviral studies.

|                   | % viable cells $\pm$ SEM |
|-------------------|--------------------------|
| negative control  | 100 $\pm$ 17             |
| AuNPs 5 nm TA     | 79 $\pm$ 11              |
| AuNPs 30 nm TA    | 87 $\pm$ 9               |
| AgNPs 5 nm TA     | 68 $\pm$ 12 *            |
| AgNPs30 nm TA     | 78 $\pm$ 11              |
| AuNPs 5nm 5MES    | 91 $\pm$ 8               |
| AuNPs 5nm 20MES   | 89 $\pm$ 2               |
| AuNPs 30nm 5MES   | 106 $\pm$ 7              |
| AuNPs 30nm 20 MES | 91 $\pm$ 5               |
| AgNPs 5nm 5MES    | 104 $\pm$ 2              |
| AgNPs 5nm 20MES   | 79 $\pm$ 1               |
| AgNPs 30nm 5MES   | 101 $\pm$ 3              |
| AgNPs 30nm 20MES  | 76 $\pm$ 2*              |
| AuNPs 5nm 5MUS    | 102 $\pm$ 2              |
| AuNPs 5nm 20MUS   | 113 $\pm$ 2              |
| AuNPs 30nm 5MUS   | 64 $\pm$ 21**            |
| AuNPs 30nm 20MUS  | 78 $\pm$ 7               |
| AgNPs 5nm 5MUS    | 107 $\pm$ 9              |
| AgNPs 5nm 20MUS   | 103 $\pm$ 8              |
| AgNPs 30nm 5MUS   | 112 $\pm$ 14             |
| AgNPs 30nm 20MUS  | 71 $\pm$ 15*             |
